# Supplementary material for: Fasoracetam in adolescents with ADHD and glutamatergic gene network variants disrupting mGluR neurotransmitter signaling
Source: PubMed Central journal article supplement (PMC5770454; doi:10.1038/s41467-017-02244-2), 2018-01-16
Supplement: 41467_2017_2244_MOESM1_ESM.pdf [file 41467_2017_2244_MOESM1_ESM.pdf]

# Supplemental Figure 1

A

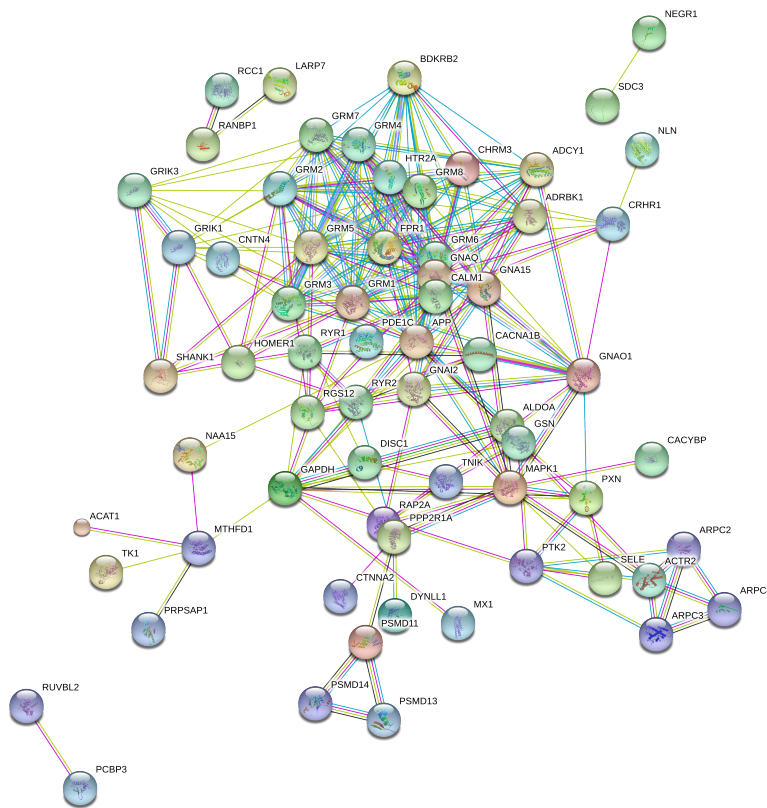

Network graph depicting pairwise experimentally validated and computationally predicted pairwise interactions across the Tier 1 mGluR genes as identified by StringDB

B

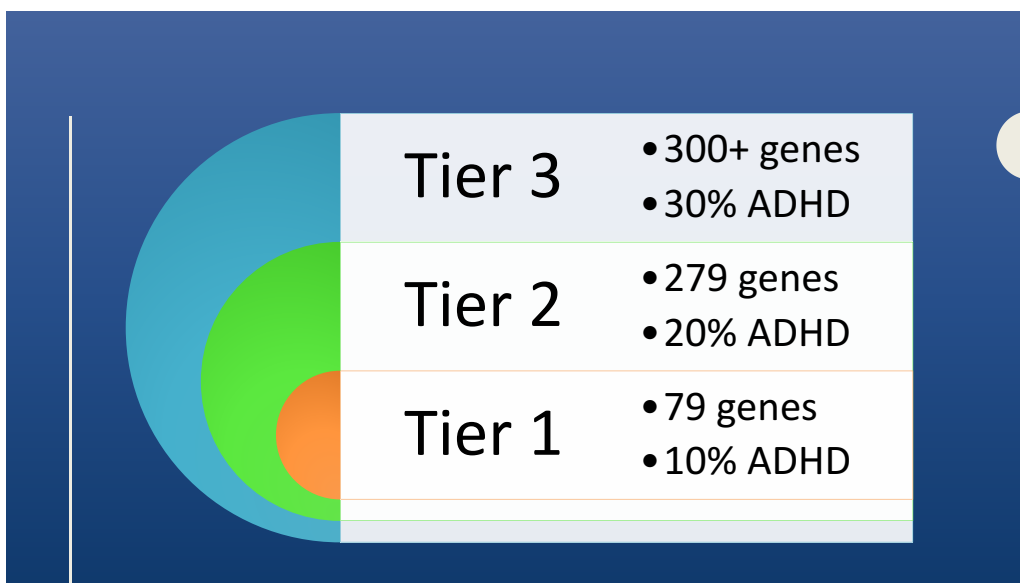

The three tiers of mGluR network genes

## Supplemental Figure 2

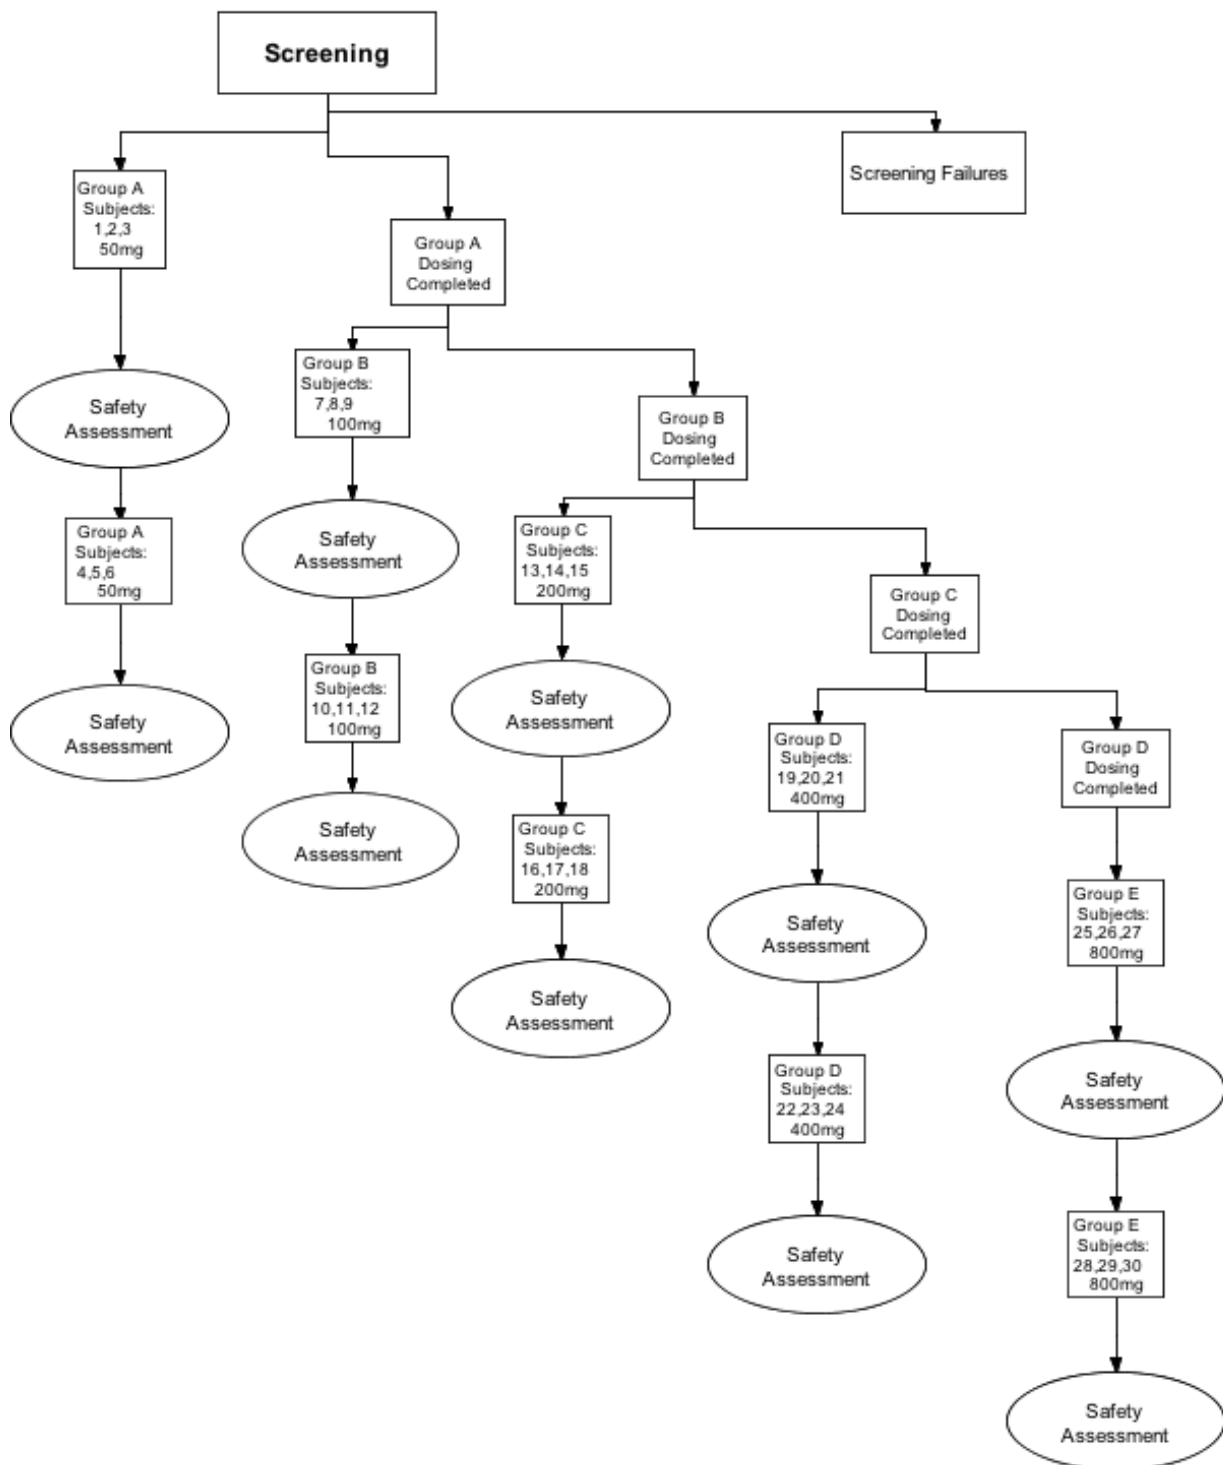

Flow diagram illustrating the dose-escalation and subject enrollment protocol study design

Supplemental Figure 3

| Week of study | Subjects/Doses           |                          |                                   |                                      |                                      |                                      |
|---------------|--------------------------|--------------------------|-----------------------------------|--------------------------------------|--------------------------------------|--------------------------------------|
| 1             | PK<br>1,2,3<br>50mg      |                          |                                   |                                      |                                      |                                      |
| 2             |                          | PK<br>4,5,6<br>50mg      |                                   |                                      |                                      |                                      |
| 3             | DE<br>1,2,3<br>Placebo   | DE<br>4,5,6<br>Placebo   | PK<br>7,8,9, 10,11,12<br>100mg    |                                      |                                      |                                      |
| 4             | DE<br>1,2,3<br>50mg bid  | DE<br>4,5,6<br>50mg bid  | DE<br>7,8,9,10,11,12<br>Placebo   | PK<br>13,14,15,16,17,18<br>200mg     |                                      |                                      |
| 5             | DE<br>1,2,3<br>100mg bid | DE<br>4,5,6<br>100mg bid | DE<br>7,8,9,10,11,12<br>50mg bid  | DE<br>13,14,15,16,17,18<br>Placebo   | PK<br>19,20,21,22,23,24<br>400mg     |                                      |
| 6             | DE<br>1,2,3<br>200mg bid | DE<br>4,5,6<br>200mg bid | DE<br>7,8,9,10,11,12<br>100mg bid | DE<br>13,14,15,16,17,18<br>50mg bid  | DE<br>19,20,21,22,23,24<br>Placebo   | PK<br>25,26,27,28,29,30<br>800mg     |
| 7             | DE<br>1,2,3<br>400mg bid | DE<br>4,5,6<br>400mg bid | DE<br>7,8,9,10,11,12<br>200mg bid | DE<br>13,14,15,16,17,18<br>100mg bid | DE<br>19,20,21,22,23,24<br>50mg bid  | DE<br>25,26,27,28,29,30<br>Placebo   |
| 8             |                          |                          | DE<br>7,8,9,10,11,12<br>400mg bid | DE<br>13,14,15,16,17,18<br>200mg bid | DE<br>19,20,21,22,23,24<br>100mg bid | DE<br>25,26,27,28,29,30<br>50mg bid  |
| 9             |                          |                          |                                   | DE<br>13,14,15,16,17,18<br>400mg bid | DE<br>19,20,21,22,23,24<br>200mg bid | DE<br>25,26,27,28,29,30<br>100mg bid |
| 10            |                          |                          |                                   |                                      | DE<br>19,20,21,22,23,24<br>400mg bid | DE<br>25,26,27,28,29,30<br>200mg bid |
| 11            |                          |                          |                                   |                                      |                                      | DE<br>25,26,27,28,29,30<br>400mg bid |

Summary flowchart of study implementation week by week including dose escalation and study subject group. PK: pharmacokinetic; DE: dose escalation; bid: twice a day

Supplemental Figure 4

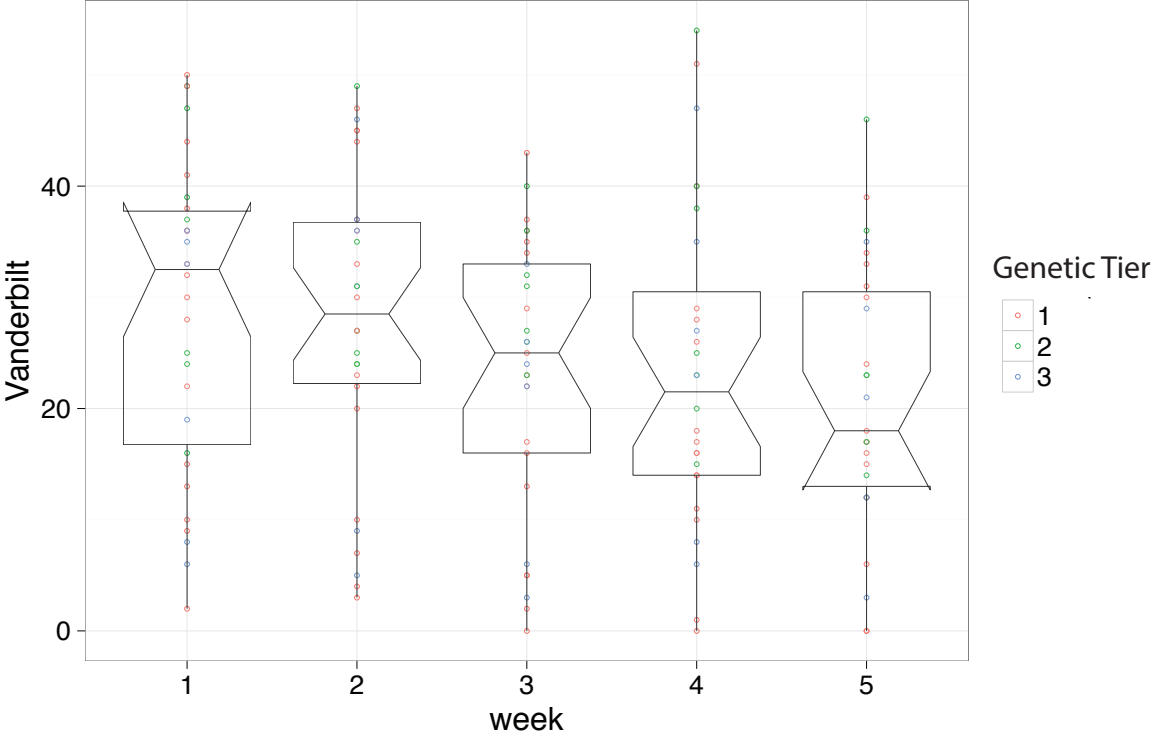

Box-plot of Vanderbilt scores for all study subjects across the five weeks of the study stratified by the patient's genetic tier. Each dot represents one subject's score. Center line in each box is the median.

# Supplemental Figure 5

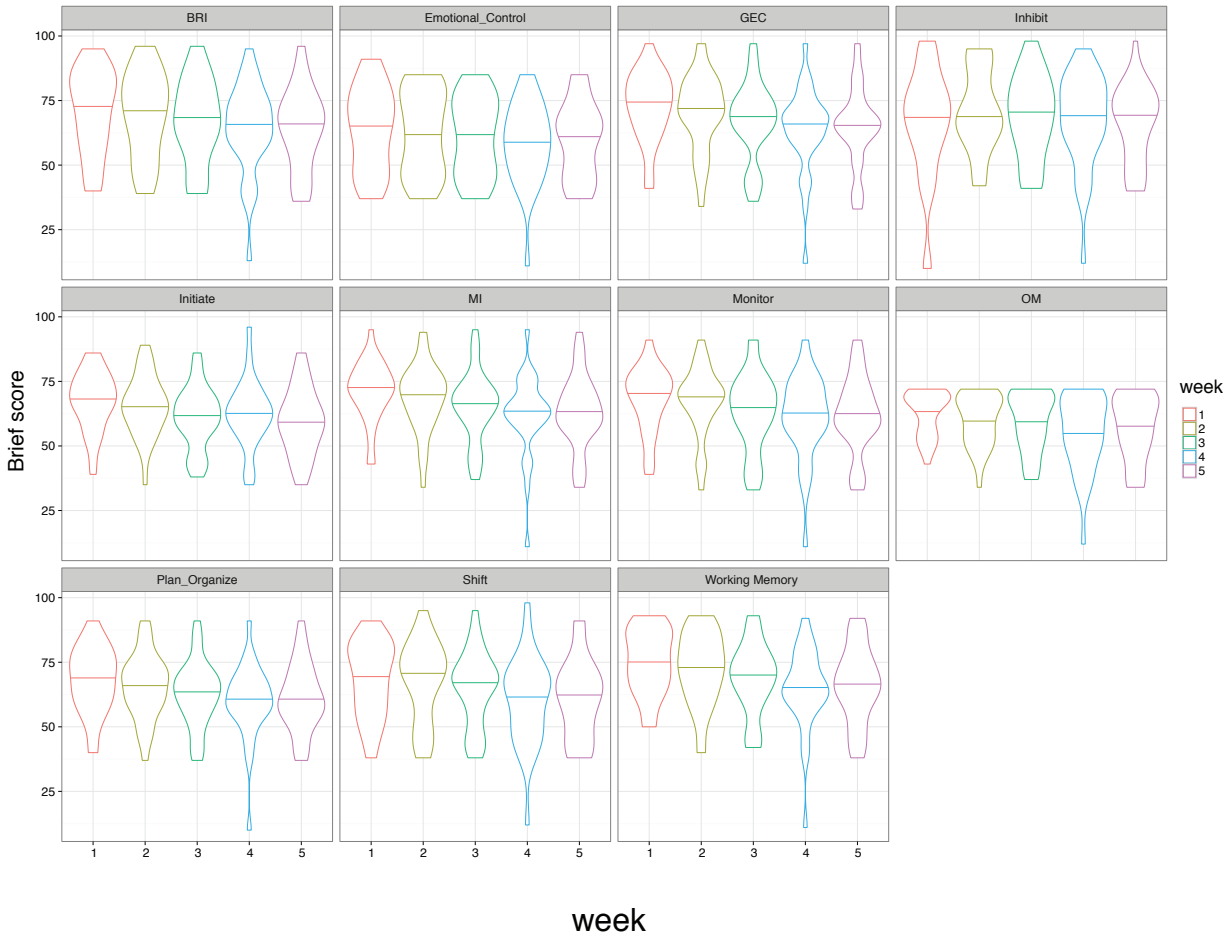

Violin plots of each of the Brief Score sub-categories by study week. Center line denotes the median score.

## Supplemental Tables

### Supplemental Table 1: Study flowsheet – ENROLLMENT and PK

|                                                             | S | E | Time after first NFC-1 dose, in hours |   |     |     |     |   |   |   |   |   |    |          |
|-------------------------------------------------------------|---|---|---------------------------------------|---|-----|-----|-----|---|---|---|---|---|----|----------|
|                                                             |   |   | PK-Day 1                              |   |     |     |     |   |   |   |   |   |    | PK-Day 2 |
|                                                             |   |   | Pre-dose                              | 0 | 0.5 | 1.0 | 1.5 | 2 | 3 | 4 | 6 | 8 | 12 | 24       |
| Genomics Informed Consent/Assent                            | X |   |                                       |   |     |     |     |   |   |   |   |   |    |          |
| Genotyping for GRM-genes                                    | X |   |                                       |   |     |     |     |   |   |   |   |   |    |          |
| Telephone Screen <sup>A</sup>                               | X |   |                                       |   |     |     |     |   |   |   |   |   |    |          |
| Informed Consent/Assent                                     |   | X |                                       |   |     |     |     |   |   |   |   |   |    |          |
| K-SADS                                                      |   | X |                                       |   |     |     |     |   |   |   |   |   |    |          |
| WAIS Brief IQ (or use past testing)                         |   | X |                                       |   |     |     |     |   |   |   |   |   |    |          |
| BRIEF (Parent; Self)                                        |   | X |                                       |   |     |     |     |   |   |   |   |   |    |          |
| Quotient®ADHD test                                          |   | X | X                                     |   |     |     |     |   |   |   |   |   |    | X        |
| PERMP-Math Baseline Test                                    |   | X |                                       |   |     |     |     |   |   |   |   |   |    |          |
| PERM-Math Test                                              |   |   | X                                     |   |     |     |     |   |   |   |   |   |    | X        |
| Actigraphy (continuous)                                     |   |   | X                                     | X | X   | X   | X   | X | X | X | X | X | X  | X        |
| CGI-I & CGI-S                                               |   | X |                                       |   |     |     |     |   |   |   |   |   |    |          |
| Demographics/Medical History                                |   | X |                                       |   |     |     |     |   |   |   |   |   |    |          |
| Physical Exam, Weight & Height                              |   | X | X                                     |   |     |     |     |   |   |   |   |   |    | X        |
| Vital Signs: BP, HR, RR                                     |   | X | X                                     |   |     |     |     | X |   | X | X |   | X  | X        |
| 12-lead ECG                                                 |   | X | X                                     |   |     |     |     |   |   |   |   |   |    | X        |
| Hematology & clinical chemistry                             |   |   | X                                     |   |     |     |     |   |   |   |   |   |    |          |
| Urinalysis                                                  |   |   | X                                     |   |     |     |     |   |   |   |   |   |    |          |
| Urine hCG test (menst. females)                             |   |   | X                                     |   |     |     |     |   |   |   |   |   |    |          |
| Meals                                                       |   |   |                                       |   |     |     |     | X |   |   | X |   | X  | X        |
| NFC-1 administration (on-site)                              |   |   |                                       | X |     |     |     |   |   |   |   |   |    |          |
| Blood sampling for PK                                       |   |   | X                                     |   | X   | X   | X   | X | X | X | X | X | X  | X        |
| Adverse Event Monitoring (including suicidal ideation/plan) |   |   | X                                     | X | X   | X   | X   | X | X | X | X | X | X  | X        |
| Dispense Week 1 medication                                  |   |   |                                       |   |     |     |     |   |   |   |   |   |    | X        |

S: Screening; E: Enrollment; ECG: Electrocardiogram; PK: Pharmacokinetics ; BP: blood pressure; HR: Heart Rate; RR: respiratory rate; hCG: human chorionic gonadotropin

**Supplemental Table 2: study flowsheet: Dose-escalation (1-14 days after 24H PK study)**

|                                                                                                                                                                                                                                                                                                                                                                                                                                                                                                                                                    | Week 1         | Week 2         | Week 3        | Week 4         | Week 5         | Week 9         |
|----------------------------------------------------------------------------------------------------------------------------------------------------------------------------------------------------------------------------------------------------------------------------------------------------------------------------------------------------------------------------------------------------------------------------------------------------------------------------------------------------------------------------------------------------|----------------|----------------|---------------|----------------|----------------|----------------|
|                                                                                                                                                                                                                                                                                                                                                                                                                                                                                                                                                    | Day 7<br>(±2)  | Day 14<br>(±2) | Day 21(±2)    | Day 28<br>(±2) | Day 35<br>(±2) | Day 75<br>(±2) |
| Adverse event monitoring (Pittsburgh Side effects Rating Scale + suicidal ideation/plan)                                                                                                                                                                                                                                                                                                                                                                                                                                                           | X              | X              | X             | X              | X              | phone          |
| Laboratory Safety Tests (blood and urine) <sup>A</sup>                                                                                                                                                                                                                                                                                                                                                                                                                                                                                             | X              | X              | X             | X              | X              |                |
| Physical Examination                                                                                                                                                                                                                                                                                                                                                                                                                                                                                                                               | X              | X              | X             | X              | X              |                |
| Vital Signs: BP, HR, RR                                                                                                                                                                                                                                                                                                                                                                                                                                                                                                                            | X              | X              | X             | X              | X              |                |
| Body Weight (all points) & Height (week 1 only)                                                                                                                                                                                                                                                                                                                                                                                                                                                                                                    | X              | X              | X             | X              | X              |                |
| 12-lead ECG                                                                                                                                                                                                                                                                                                                                                                                                                                                                                                                                        | X              | X              | X             | X              | X              |                |
| Urine hCG test (menstruating females only)                                                                                                                                                                                                                                                                                                                                                                                                                                                                                                         | X              | X              | X             | X              | X              |                |
| Contraception verification (selected females)                                                                                                                                                                                                                                                                                                                                                                                                                                                                                                      | X              | X              | X             | X              | X              |                |
| Vanderbilt Parent Rating Scale                                                                                                                                                                                                                                                                                                                                                                                                                                                                                                                     | X              | X              | X             | X              | X              |                |
| BREIF (Parent; Self)                                                                                                                                                                                                                                                                                                                                                                                                                                                                                                                               | X              | X              | X             | X              | X              |                |
| Quotient®ADHD test                                                                                                                                                                                                                                                                                                                                                                                                                                                                                                                                 | X              | X              | X             | X              | X              |                |
| PERMP-Math test                                                                                                                                                                                                                                                                                                                                                                                                                                                                                                                                    | X              | X              | X             | X              | X              |                |
| Actigraphy (continuous monitoring)                                                                                                                                                                                                                                                                                                                                                                                                                                                                                                                 | X              | X              | X             | X              | X              |                |
| CGI-S & CGI-I                                                                                                                                                                                                                                                                                                                                                                                                                                                                                                                                      | X              | X              | X             | X              | X              |                |
| Dispense study drug <sup>B</sup>                                                                                                                                                                                                                                                                                                                                                                                                                                                                                                                   | X              | X              | X             | X              |                |                |
| NFC-1 or placebo administration at home <sup>C</sup>                                                                                                                                                                                                                                                                                                                                                                                                                                                                                               | Placebo<br>bid | 50 mg<br>bid   | 100 mg<br>bid | 200 mg<br>bid  | 400 mg<br>bid  |                |
| Retrieve pill bottle/pill count                                                                                                                                                                                                                                                                                                                                                                                                                                                                                                                    | X              | X              | X             | X              | X              |                |
| <p>A: Blood draws for hematology (RBC, WBC with differential, platelet count) and clinical chemistry (electrolytes, albumin, ALT, AST, alkaline phosphatase, bilirubin, BUN, creatinine kinase, glucose), NFC-1 and major metabolite serum levels.<br/>                     B: Study drug for Week 1 administered at end of PK study; study drug for next week dispensed at each clinic visit<br/>                     C:Dose escalations to be determined by CGI-S and CGI-I scores at end of each week of treatment; maximum doses indicated</p> |                |                |               |                |                |                |

Supplemental Table 3: Detailed adverse events reported by study week

| AE                                     | Enrollment | PK/day2 | Week 1 | Week 2 | Week 3 | Week 4 | Week 5 | Week 6 Followup | Week A -<br>Unscheduled Visit | Week B -<br>Unscheduled Visit | Total |
|----------------------------------------|------------|---------|--------|--------|--------|--------|--------|-----------------|-------------------------------|-------------------------------|-------|
| Abdominal Discomfort                   |            |         |        |        |        | 1      |        |                 |                               |                               | 1     |
| Abdominal Pain                         |            |         |        |        |        |        | 1      |                 |                               |                               | 1     |
| Abdominal Pain Upper                   | 1          | 1       | 1      | 1      | 1      | 3      | 3      | 2               |                               |                               | 13    |
| Agitation                              |            |         |        |        |        | 1      |        |                 |                               |                               | 1     |
| Alopecia                               |            |         |        |        |        |        |        | 1               |                               |                               | 1     |
| Anger                                  |            |         |        | 1      |        |        |        |                 |                               |                               | 1     |
| Anxiety                                |            |         |        |        |        |        |        | 3               |                               |                               | 3     |
| Back Pain                              |            |         |        |        |        | 1      |        |                 |                               |                               | 1     |
| Blepharospasm                          |            |         |        |        |        |        |        | 1               |                               |                               | 1     |
| Blood creatine phosphokinase increased |            |         |        |        | 1      |        |        |                 |                               |                               | 1     |
| Chills                                 |            | 1       |        |        |        |        |        |                 |                               |                               | 1     |
| Contusion                              | 1          | 1       |        | 1      |        | 1      |        |                 |                               |                               | 4     |
| Cough                                  |            |         |        | 1      | 2      | 1      |        |                 |                               |                               | 4     |
| Decreased Appetite                     |            |         | 1      |        |        |        |        |                 |                               |                               | 1     |
| Depressed Mood                         |            |         |        | 1      |        | 1      |        | 2               |                               |                               | 4     |
| Depression                             |            |         |        |        |        |        |        | 1               |                               |                               | 1     |
| Dermatillomania                        |            | 1       |        |        |        |        |        |                 |                               |                               | 1     |
| Diarrhoea                              |            | 1       | 3      |        | 1      | 1      | 1      | 2               | 1                             |                               | 10    |
| Dizziness                              |            | 1       | 1      |        | 2      | 2      | 3      | 1               |                               |                               | 10    |
| Dry eye                                |            |         |        |        | 1      |        |        |                 |                               |                               | 1     |
| Dysmenorrhoea                          |            |         |        |        |        | 1      |        |                 |                               |                               | 1     |
| Ecchymosis                             |            | 1       |        |        |        |        |        |                 |                               |                               | 1     |
| Enuresis                               |            |         | 1      | 1      |        |        |        |                 |                               |                               | 2     |
| Epistaxis                              | 1          |         | 1      |        |        |        |        |                 |                               |                               | 2     |
| Eye pain                               |            |         | 1      |        |        |        |        |                 |                               |                               | 1     |
| Eye Pruritus                           |            |         |        |        |        | 1      |        |                 |                               |                               | 1     |
| Fatigue                                |            | 5       | 7      | 3      | 6      | 3      | 1      | 1               | 1                             |                               | 27    |
| Flatulence                             |            | 1       |        |        |        |        |        |                 |                               |                               | 1     |
| Flushing                               |            |         |        | 1      |        |        |        |                 |                               |                               | 1     |
| Head Injury                            |            |         |        |        | 1      |        |        |                 |                               |                               | 1     |
| Headache                               |            | 2       | 12     | 9      | 6      | 8      | 3      | 4               |                               |                               | 44    |
| Hyperhidrosis                          |            |         |        |        |        |        | 1      |                 |                               |                               | 1     |
| Hypertension                           |            |         |        |        |        |        |        | 1               |                               |                               | 1     |
| Impetigo                               |            |         |        | 1      | 1      |        |        |                 |                               |                               | 2     |
| Increased Appetite                     |            |         |        | 1      |        |        |        |                 |                               |                               | 1     |
| Insomnia                               |            |         |        |        |        |        |        | 1               |                               |                               | 1     |



|                           |          |           |           |           |           |           |           |           |          |          |            |
|---------------------------|----------|-----------|-----------|-----------|-----------|-----------|-----------|-----------|----------|----------|------------|
| Irritability              |          |           | 1         | 1         |           | 2         | 1         | 4         |          |          | 9          |
| Laceration                |          | 2         |           |           |           | 1         |           |           |          |          | 3          |
| Malaise                   |          |           |           | 1         |           |           |           |           |          |          | 1          |
| Memory Impairment         |          |           |           |           | 1         |           |           | 1         |          |          | 2          |
| Migraine                  |          |           |           |           | 1         |           |           |           |          |          | 1          |
| Mood Altered              |          |           | 1         |           |           |           |           |           |          |          | 1          |
| Mood swings               |          |           |           |           |           |           |           | 1         |          |          | 1          |
| Muscle Spasms             |          |           |           |           |           |           | 1         |           |          |          | 1          |
| Muscle Twitching          |          |           |           |           |           |           |           | 1         |          |          | 1          |
| Nasal Congestion          |          |           |           |           | 1         |           |           |           |          |          | 1          |
| Nasal Discomfort          |          |           | 1         |           |           |           |           |           |          |          | 1          |
| Nausea                    | 1        | 3         |           |           |           | 2         | 1         |           |          |          | 7          |
| Onychophagia              |          |           | 2         |           | 1         |           |           |           |          |          | 3          |
| Oropharyngeal Pain        |          | 1         |           |           |           | 1         | 2         |           |          |          | 4          |
| Pain                      |          |           |           | 1         |           |           |           |           |          |          | 1          |
| Pain in Extremity         |          |           |           |           |           |           |           |           |          | 1        | 1          |
| Presyncope                |          |           |           |           | 1         |           |           |           |          |          | 1          |
| Pyrexia                   |          |           |           | 1         |           | 1         | 1         | 2         |          |          | 5          |
| Rash                      |          |           |           |           |           | 1         |           |           |          |          | 1          |
| Restlessness              |          |           |           |           |           |           |           | 1         |          |          | 1          |
| Rhinorrhoea               |          |           |           |           |           | 1         |           |           |          |          | 1          |
| Self-injurious Ideation   |          |           |           |           | 1         |           |           |           |          |          | 1          |
| Skin Irritation           |          | 1         |           |           |           |           |           |           |          |          | 1          |
| Social Avoidant Behaviour |          |           |           | 1         |           |           |           | 1         |          |          | 2          |
| Somnolence                |          |           | 2         |           | 1         |           |           |           |          |          | 3          |
| Swelling                  |          |           |           |           | 1         |           |           |           |          |          | 1          |
| Swelling Face             |          | 1         |           |           |           |           |           |           |          |          | 1          |
| Tearfulness               |          |           |           | 3         |           |           |           |           |          |          | 3          |
| Thinking Abnormal         |          |           |           |           | 1         |           |           |           |          |          | 1          |
| Tinnitus                  |          |           |           |           |           |           | 1         |           |          |          | 1          |
| Visual Impairment         |          |           | 1         |           |           |           | 1         |           |          |          | 2          |
| Vomiting                  |          |           |           |           |           |           |           | 1         |          | 1        | 2          |
| <b>Total</b>              | <b>4</b> | <b>23</b> | <b>37</b> | <b>28</b> | <b>32</b> | <b>34</b> | <b>21</b> | <b>32</b> | <b>2</b> | <b>2</b> | <b>215</b> |

Note that week 1 refers to study baseline or a week of placebo and each week between weeks 2-5 the patient received the study drug

## Supplemental Table 4

### Medications Discontinued at Enrollment and those maintained during the study

| Study participant | Stimulants | Atomoxetine        | Guanfacine | Other Meds        | During Study |
|-------------------|------------|--------------------|------------|-------------------|--------------|
| 101               |            |                    |            | Fluoxetine        |              |
| 102               |            |                    |            | Clonidine-sleep   | Clonidine    |
| 104               | Vyvanse    |                    |            |                   |              |
| 105               | Adderall   |                    |            |                   |              |
| 107               | Vyvanse    |                    |            |                   |              |
| 108               |            |                    |            | Lamictal          | Lamictal     |
| 109               |            | <b>Atomoxetine</b> |            |                   |              |
| 113               |            |                    |            | Sertraline        | Sertraline   |
| 114               | Concerta   |                    |            |                   |              |
| 115               |            |                    |            | Clonidine (sleep) |              |
| 118               | Concerta   |                    |            |                   |              |
| 119               | Concerta   |                    |            |                   |              |
| 121               |            |                    |            | Clonidine (sleep) |              |
| 125               |            |                    |            | Risperidone       |              |
|                   |            |                    |            |                   |              |

Note: Unless a medication appears in the last column "During Study" all other medications were discontinued for the duration of the washout period.
